# Supplementary material for: Dual regulatory switch through interactions of Tcf7l2/Tcf4 with stage-specific partners propels oligodendroglial maturation
Source: PubMed Central journal article supplement (PMC4786870; doi:10.1038/ncomms10883), 2016-03-09
Supplement: ncomms10883-s1.pdf [file ncomms10883-s1.pdf]

**SUPPLEMENTARY INFORMATION**  
*Zhao et al.*

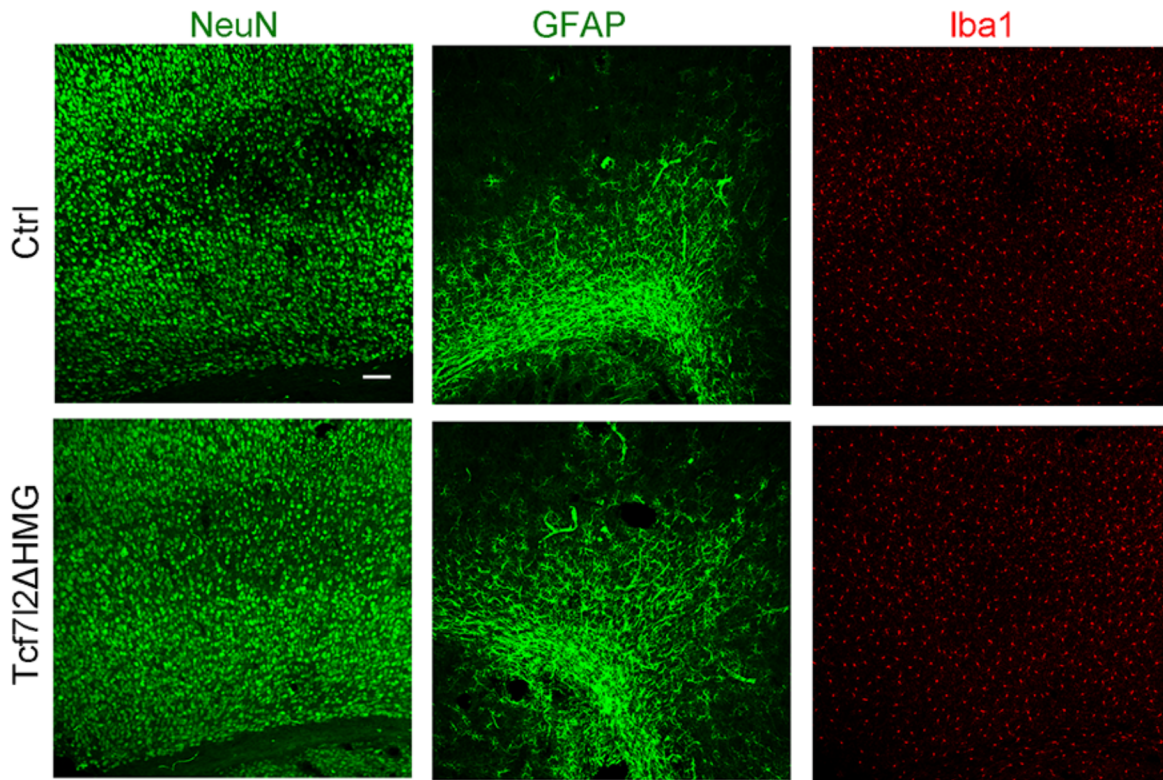

**Supplementary Figure 1. *Tcf7l2* ablation in *Olig1*-Cre-expressing cells does not affect the formation of neurons, astrocytes, or microglia**

The cortices of control (Ctrl) and *Tcf7l2*ΔHMG mice at P14 were immunostained with the pan-neuronal marker NeuN, astrocyte marker GFAP, and microglia marker Iba1 as indicated. Scale bar, 100 μm.

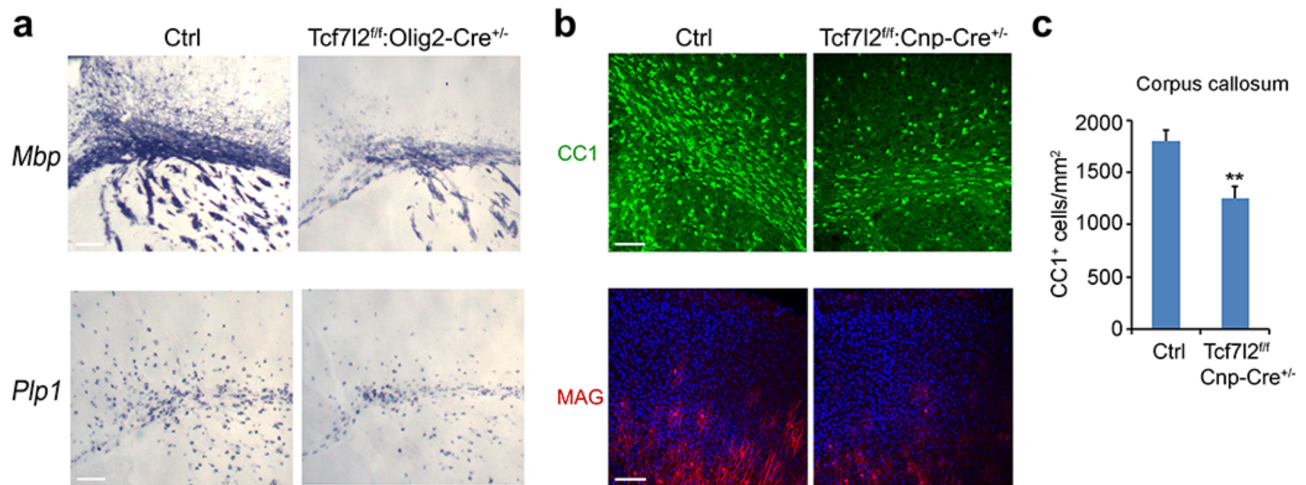

**Supplementary Figure 2. *Tcf712* ablation by *Olig2-Cre* or *CNP-Cre*-expressing cells impairs OL differentiation.**

**(a)** *In situ* hybridization analysis of *Mbp* and *Plp1* in cortical sections of control and *Tcf712<sup>ff</sup>:Olig2-Cre* mice at P14. Scale bar, 100  $\mu$ m.

**(b)** Expression of CC1<sup>+</sup> and MAG<sup>+</sup> myelinating cells by immunostaining in the cortex of control and *Tcf712<sup>ff</sup>:CNP-Cre* mice at P14. Scale bar, 50  $\mu$ m.

**(c)** Quantification of CC1<sup>+</sup> OLs (per mm<sup>2</sup>) in the corpus callosum of control and *Tcf712 $\Delta$ HMG* at P14. n = 3 animals/genotype (\*\* p < 0.01; Student's *t* test).

*PDGFR* $\alpha$

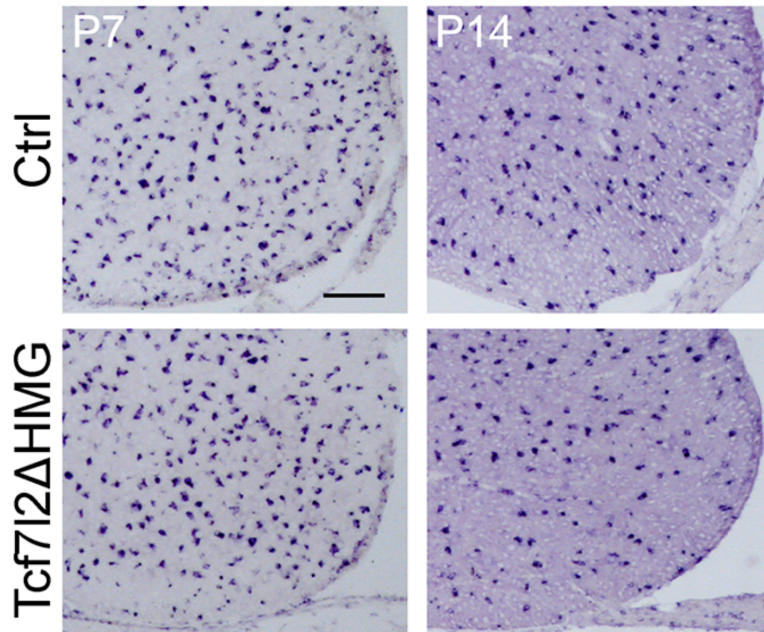

**Supplementary Figure 3. *Tcf7l2* ablation in oligodendrocyte lineage cells do not affect OPC development in the spinal cord**

Expression of *PDGFR* $\alpha$  in the spinal cord from control (Ctrl) and *Tcf7l2* $\Delta$ HMG mice at P7 and P14 by *in situ* hybridization. Scale bar, 50  $\mu$ m.

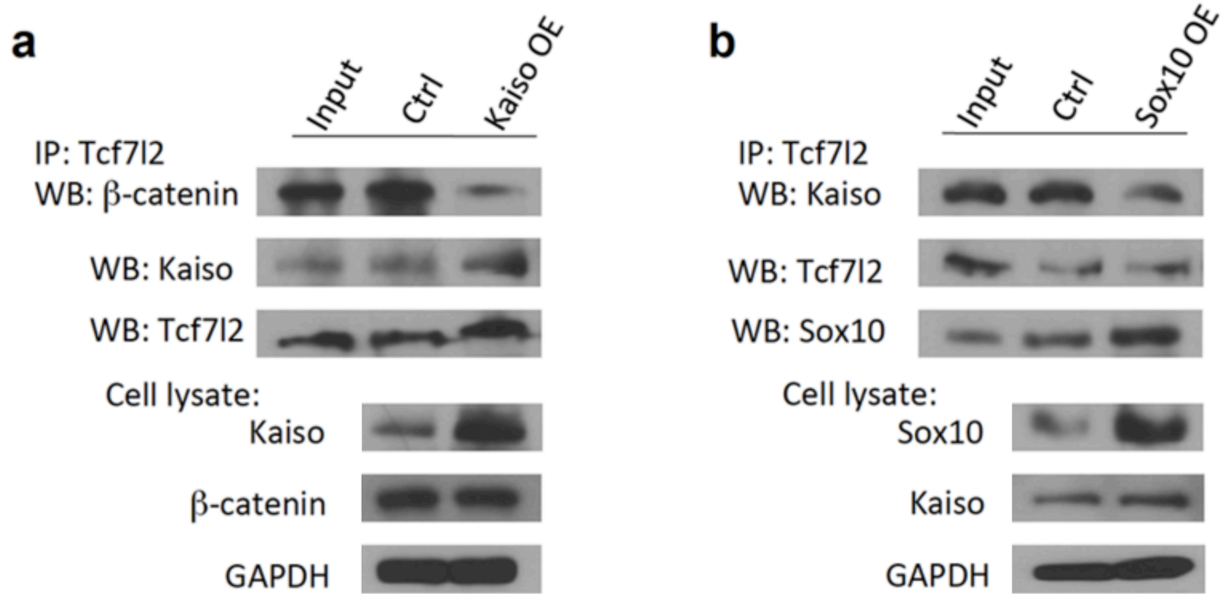

**Supplementary Figure 4. Competitive binding among Kaiso, Sox10,  $\beta$ -catenin and Tcf712**

(a) Kaiso competes with  $\beta$ -catenin interaction with Tcf712 in Oli-neu cells. The control and pCS2-*Kaiso* were transfected into Oli-neu cells for 48 hr. Lysates were co-immunoprecipitated with anti-Tcf712 antibody. Co-immunoprecipitates and cell lysates were subjected to western blot analysis with indicated antibodies. OE, overexpression. GAPDH was used as a loading control.

(b) Sox10 competes with Kaiso to interact with Tcf712 in Oli-neu cells. The control and pcDNA3-*Sox10* were transfected into Oli-neu cells for 48 hr. Cell lysates were co-immunoprecipitated with anti-Tcf712 antibody. Co-immunoprecipitates and cell lysates were subjected to western blot analysis with indicated antibodies. GAPDH was used as a loading control.

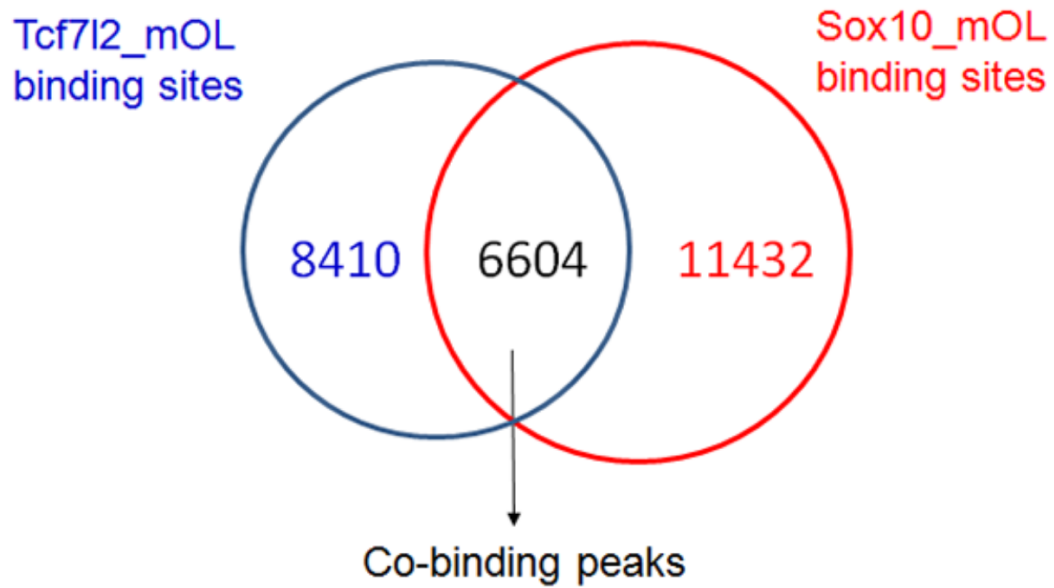

**Supplementary Figure 5. Overlapping Tcf7l2 and Sox10 genome occupancy in mOLs**  
A Venn diagram shows a 44% overlap of Tcf7l2 and Sox10 genome occupancy in mOLs.

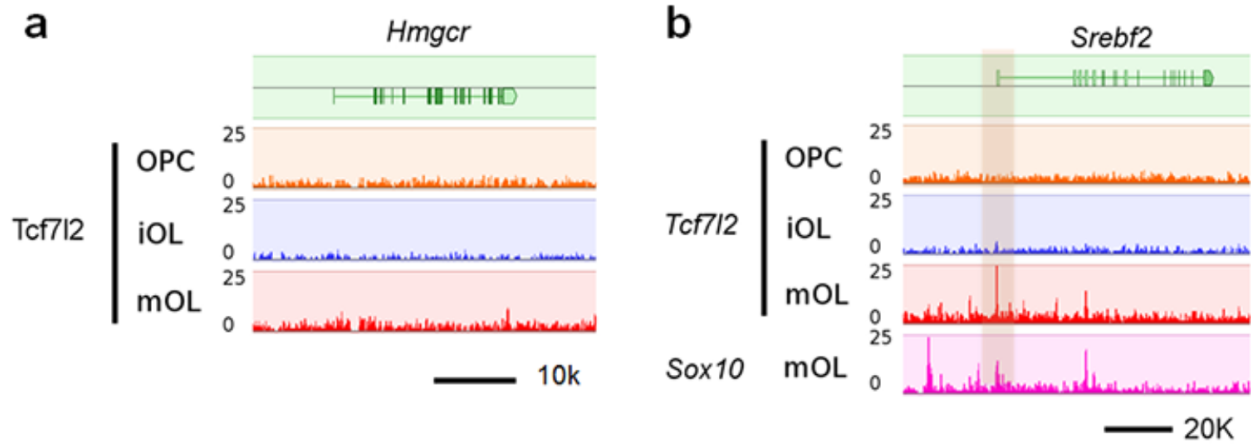

**Supplementary Figure 6. Tcf712 and Sox10 occupancy on *Hmgcr* and *Srebf2* genes in oligodendrocyte lineage cells**

Genome browser visualization of Tcf712 and Sox10 binding profiles on the promoter regions of 3-Hydroxy-3-methylglutaryl-CoA reductase (*Hmgcr*) gene (a) and Sterol regulatory element binding transcription factor 2 (*Srebf2*) gene (b) in OPCs, iOLs and mOLs.

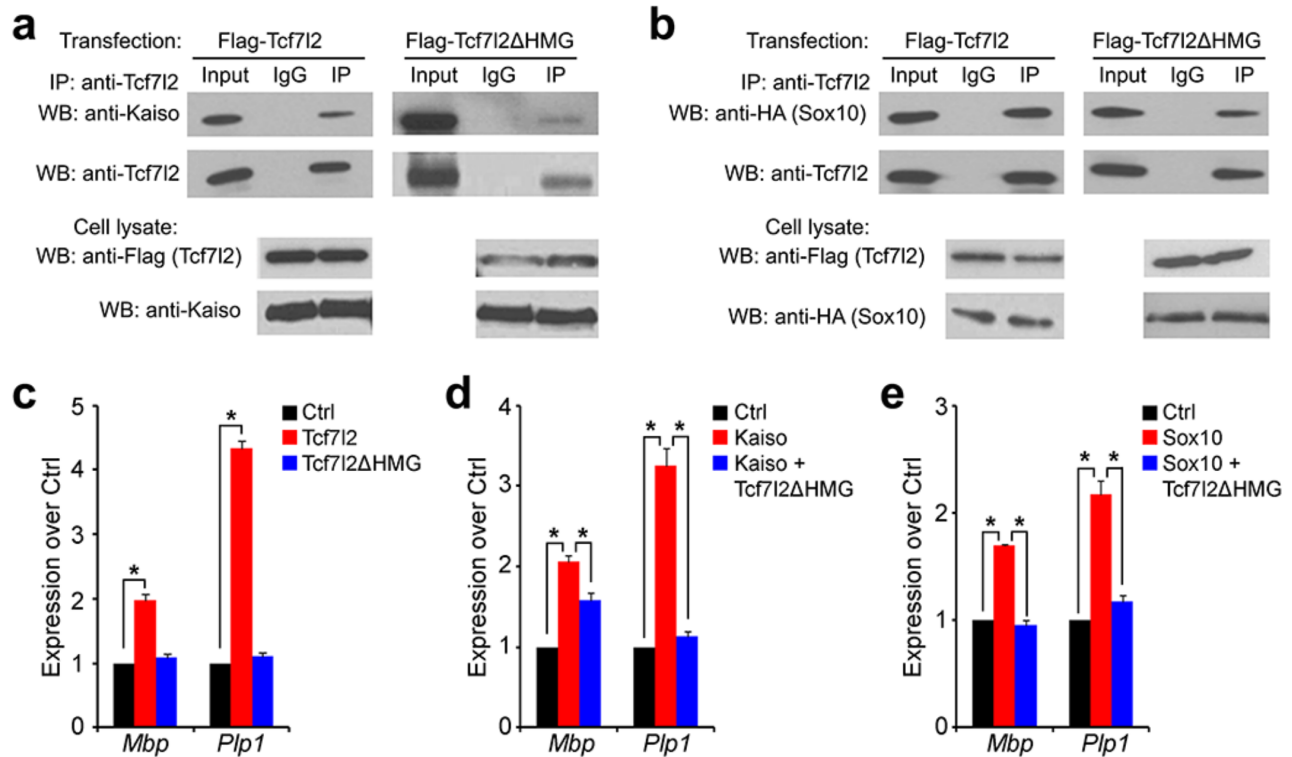

### Supplementary Figure 7. *Tcf7l2*ΔHMG interacts with Kaiso and Sox10 and inhibits their activity for promoting myelin gene expression

(a,b) Expression vectors carrying Flag-tagged *Tcf7l2* and *Tcf7l2*ΔHMG were co-transfected with an vector expressing Myc-tag Kaiso (a) or HA-tagged Sox10 (b) into 293T cells for 48 hr. Lysates were co-immunoprecipitated with anti-*Tcf7l2* antibody. Co-immunoprecipitates and cell lysates were subjected to western blot analysis with indicated antibodies. OE, overexpression.

(c) qRT-PCR analysis of expression of myelin genes in Oli-neu cells transfected with pcDNA3-control, *Tcf7l2*, and *Tcf7l2*ΔHMG. Data represent the means ± SEMs from three animals/genotype (\* $p < 0.05$ , \*\* $p < 0.01$ ; Student's *t* test).

(c,d) qRT-PCR analysis of expression of myelin genes in Oli-neu cells transfected with pCS2-*Kaiso* or *Sox10*, or together with *Tcf7l2*ΔHMG. Data represent the means ± SEMs from three animals/genotype (\* $p < 0.05$ , \*\* $p < 0.01$ ; Student's *t* test).

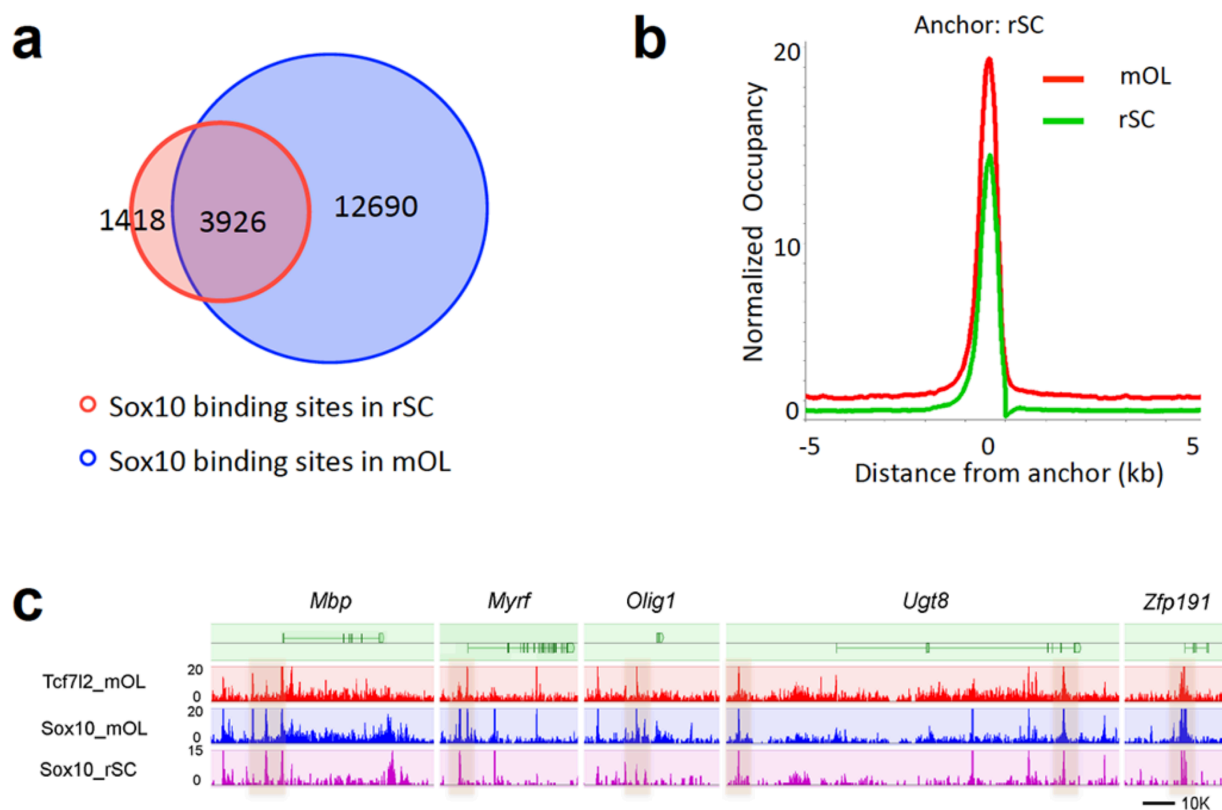

### Supplementary Figure 8. Sox10 genomic occupancy in cultured oligodendrocytes and spinal cord

(a) The Venn diagram shows that the majority of Sox10 binding sites in spinal cord tissues (SC) overlap with those in cultured mOL. Notably, detected binding sites appear more prolific in isolated OLs than the spinal cord. This could likely be due to differential binding under *in vivo* and *in vitro* conditions or the smaller proportion of OLs in the spinal cord, which may engender a lower signal to noise ratio, leading to an underestimation of binding sites in the intact tissues producing low signal amplitudes.

(b) ChIP-seq binding profiles of Sox10 in mOLs around Sox10 peak summits in rat spinal cord.

(c) Representative genome browser view of the distribution of Tcf7l2 and Sox10 binding on the promoter regions of myelin genes (*Mbp*, *Myrf*, *Cldn11*, *Ugt8*, and *Zfp191*) in both mOLs and rat spinal cord (SC) tissues. Representative commonly targeted sites are highlighted.

(d) Genome browser depicts that the binding intensity of Sox10 on the promoter regions of a set of myelination-associated genes (e.g. *Olig1*, *Plp1*, *Mag*, *Gpr37*, and *Ubl3*) is higher in mOLs than that in rat spinal cord (SC) tissues.



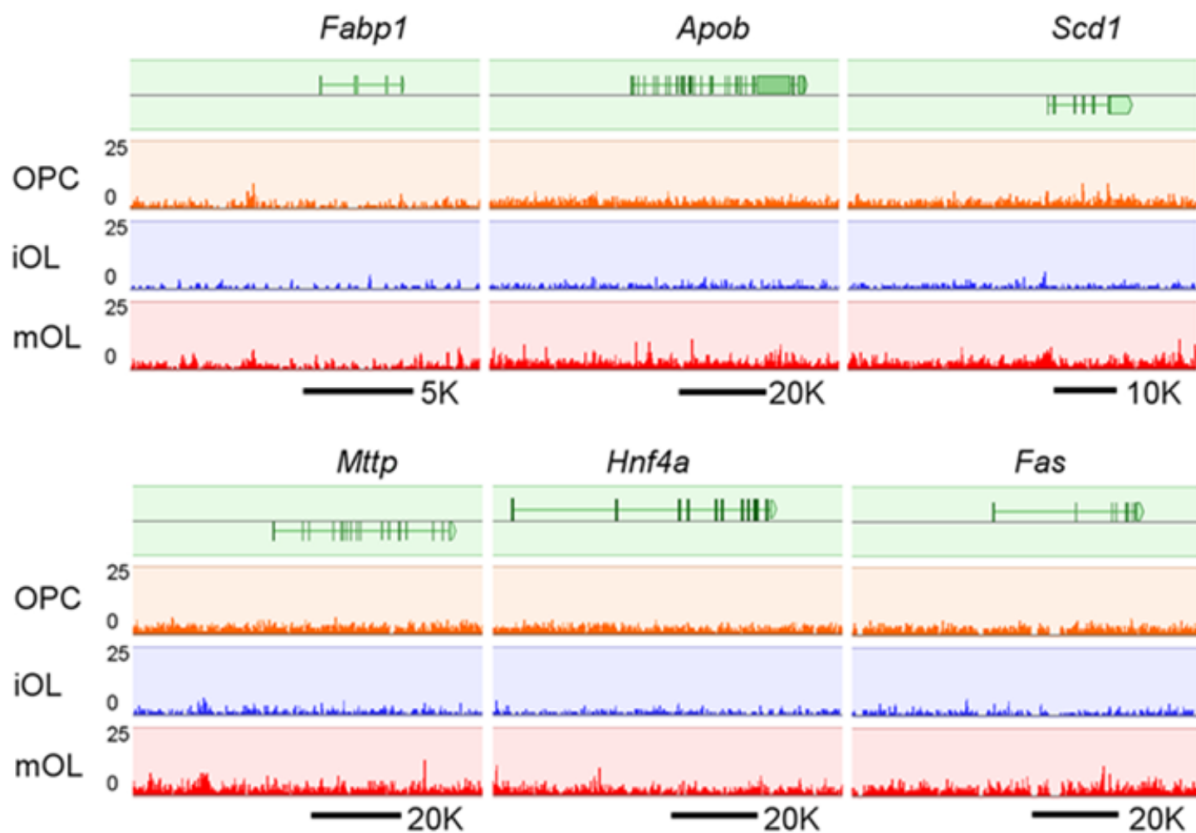

**Supplementary Figure 9. Tcf7l2 occupancy on lipid biosynthesis and metabolism genes in oligodendrocyte lineage cells**

Genome browser visualization of Tcf7l2 binding profiles in the promoter regions of lipid metabolism genes in OPCs, iOLs and mOLs including *Fabp1*, encoding liver-specific fatty-acid binding protein-1; *Apob*, encoding apolipoprotein B; *Scd1*, encoding stearoyl-CoA desaturase-1; *Mttp*, encoding microsomal triglyceride transfer protein; *Hnf4a*, encoding hepatocyte nuclear factor 4 alpha, and *Fas*, encoding fatty acid synthase.

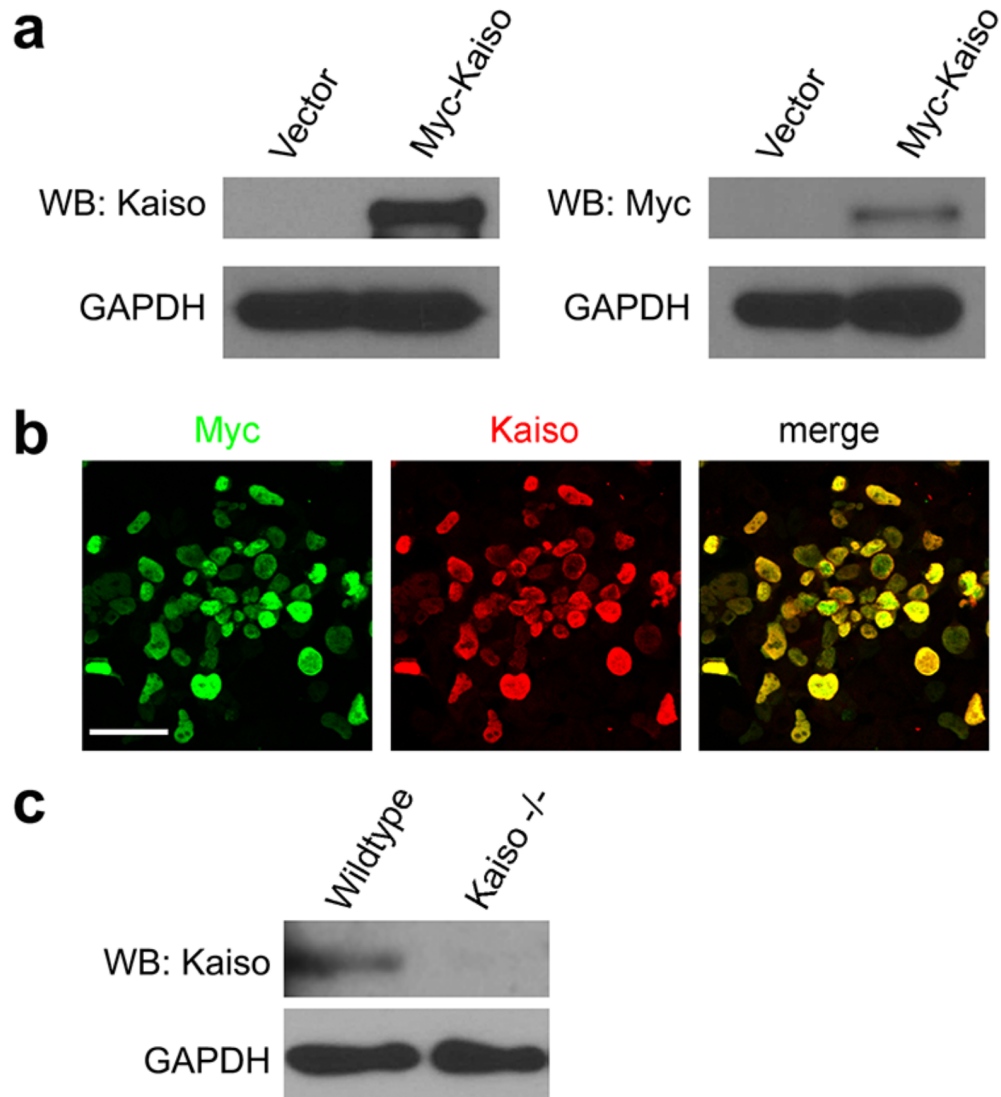

**Supplementary Figure 10. Validation of anti-Zbtb33 specificity**

(a,b) 293T cells were transfected with a Myc-tag-Kaiso expression vector and assayed by western blotting (a) and immunostaining (b) with anti-Kaiso (red) and anti-Myc (green). Scale bar, 50  $\mu$ m.

(c) The adult brain tissues of wildtype and Kaiso null mutants were subject to western blot analysis with anti-Kaiso. GAPDH as a loading control.

**Fig. 1b**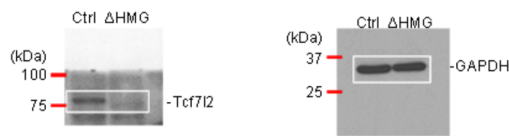**Fig. 4c**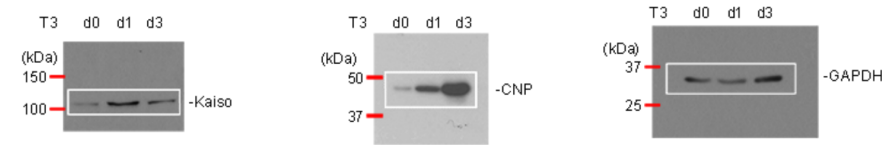**Fig. 4i**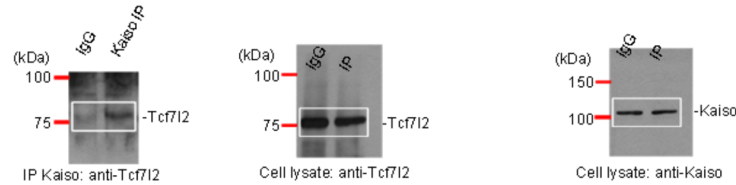**Fig. 4j**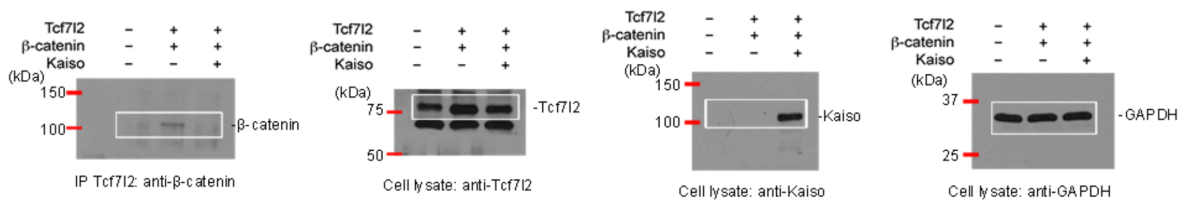**Fig. 5d**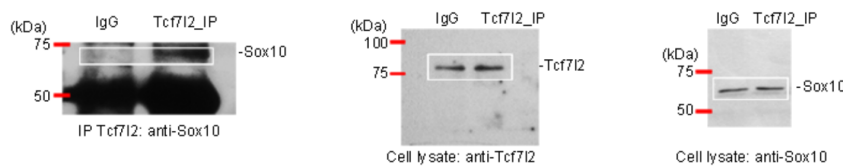**Fig. 5g**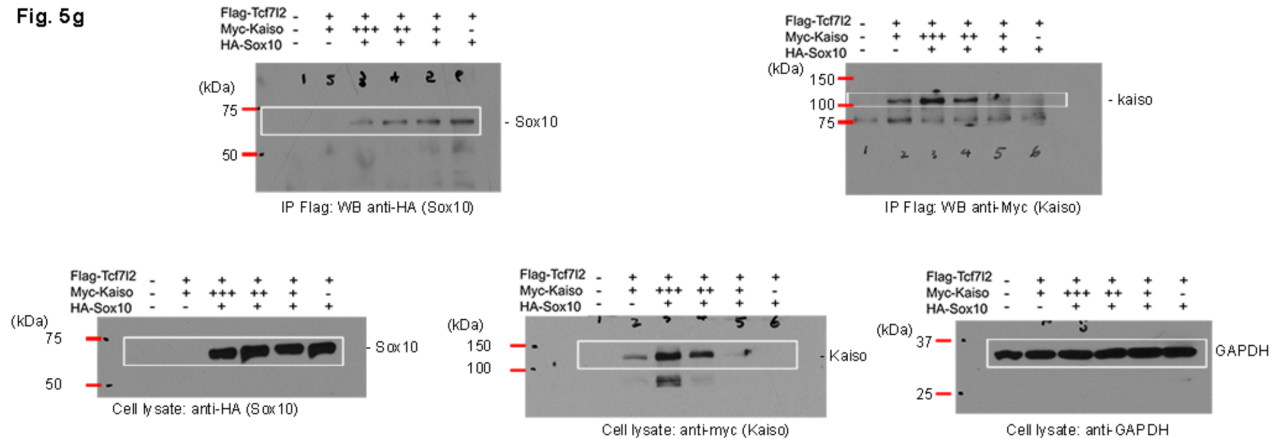**Supplementary Figure 11. Full scans of western blots in main Figures.**

Figure 1b, showing wildtype Tcf712 and Tcf712 $\Delta$ HMG blot and GAPDH control;  
 Figure 4c, showing Kaiso, CNP, and GAPDH blots in OPC and OL treated with T3 for 1 and 3 days;  
 Figure 4i, showing Kaiso immunoprecipitated with Tcf712 in cultured iOLs and cell lysate controls;  
 Figure 4j, showing that Kaiso competes with beta-catenin to interact with Tcf712 in 293T cells transfected with indicated expression vectors;  
 Figure 5d, showing Sox10 immunoprecipitated with Tcf712 in cultured mOLs and cell lysate controls;  
 Figure 5g, showing that Sox10 competes with Kaiso to interact with Tcf712 in 293T cells transfected with indicated expression vectors.

Suppl. Fig. 4

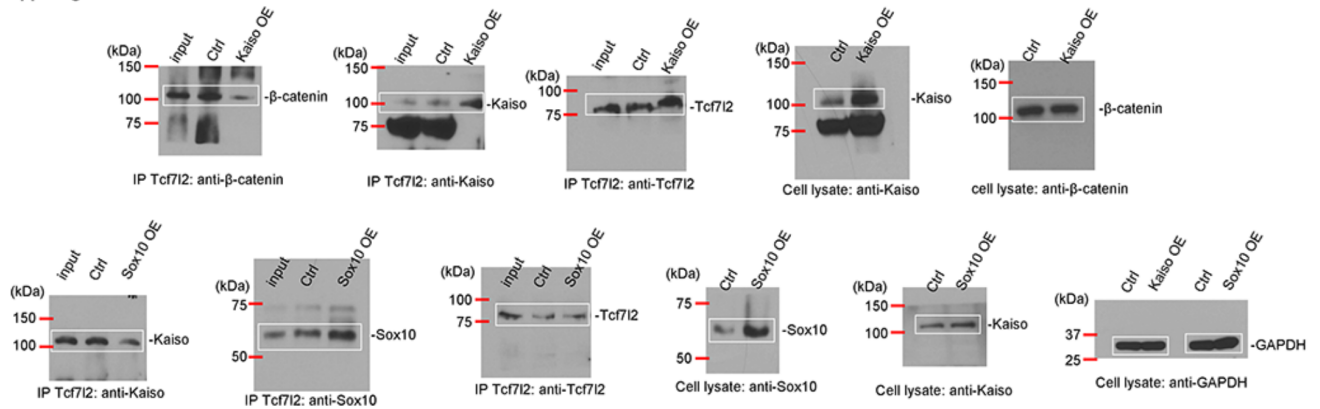

Suppl. Fig. 7a

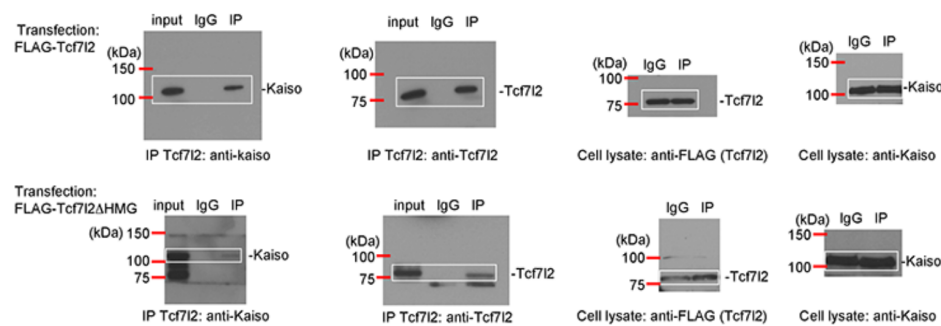

Suppl. Fig. 7b

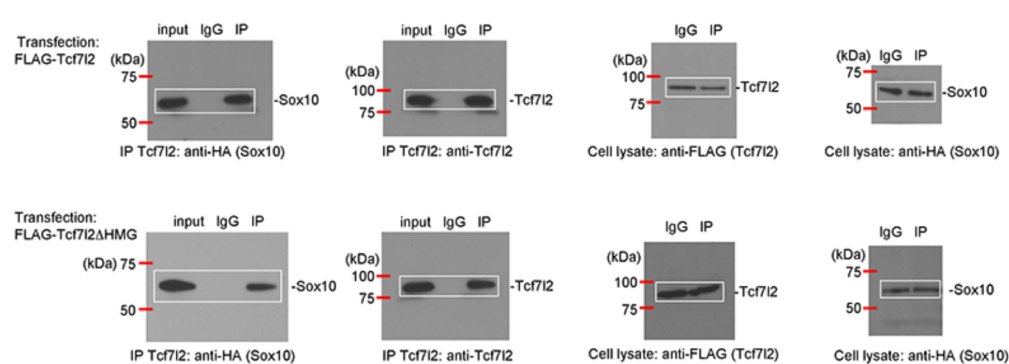

Suppl. Fig. 10a

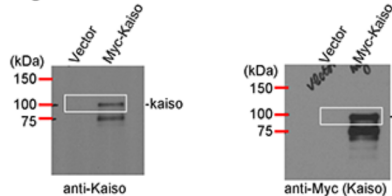

Suppl. Fig. 10c

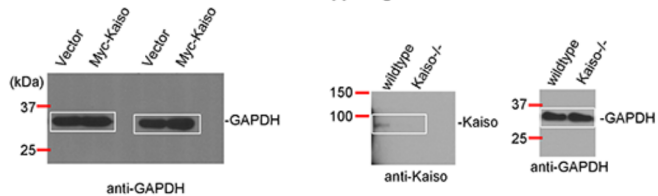

## Supplementary Figure 12. Full scans of western blots in Supplementary Figures

Suppl. Fig. 4, showing competitive binding among Kaiso, Sox10, β-catenin and Tcf712 in Oli-neu cells transfected with indicated expression vectors;

Suppl. Fig. 7a, showing wildtype Tcf712 interaction with Kaiso and Sox10 in transfected 293T cells;

Suppl. Fig. 7b, showing Tcf712ΔHMG interaction with Kaiso and Sox10 in transfected 293T cells;

Suppl. Fig. 10a, showing Kaiso antibody recognition of the overexpressed Myc-Kaiso;

Suppl. Fig. 10b, showing Kaiso antibody specificity validated with control and Kaiso null mouse brain tissues.

## Supplementary Table 1

### Primer sequences for qRT-PCR

| gene                 | Species | Forward                  | Reverse                         |
|----------------------|---------|--------------------------|---------------------------------|
| <i>Gapdh</i>         | mouse   | tgccaaatatgatgacatcaagaa | ggagtgggtgtcgtctgtg             |
| <i>Tcf712 exon11</i> | mouse   | tccaggaagaacaggcaaa      | tagttatcccgtgcagacca            |
| <i>Sox10</i>         | mouse   | gttgtactttagtccggatg     | gtaccctcacctccacaatg            |
| <i>Plp1</i>          | mouse   | tgctcggctgtacctgtgtacatt | tacattctggcatcagcgcagaga        |
| <i>Cnp</i>           | mouse   | tccacgagtgcagacgctattca  | tgtaagcatcagcggacaccatct        |
| <i>Mbp</i>           | mouse   | tcacagaagagaccctcaca     | gccgtagtgggtagtcttg             |
| <i>Myrf</i>          | mouse   | cagaccagggtgctacac       | tctgtctgatcattccgttc            |
| <i>Idh1</i>          | mouse   | gactcagtagcccaaggttatg   | tttctggtagatcgggtagtg           |
| <i>Zbtb20</i>        | mouse   | ctgtcagtaacagctccgataag  | gggtttctgtctggcgtaaata          |
| <i>Bmp7</i>          | mouse   | ggaattctccaccctcgatac    | ctcccggatgtagtcttataga          |
| <i>Hes1</i>          | mouse   | tggaatgccgggagctatctttct | tggaatgccgggagctatctttct        |
| <i>Kaiso</i>         | mouse   | gttccaaagtgtccgtgttag    | ggacaccaagctctgctataa           |
| <i>Tcf712</i>        | mouse   | atggttagtaccacagcaagg    | gggaggggaacctagacataga          |
| <i>Id2</i>           | mouse   | atggaaatcctgcagcacgctc   | tggttctgtccaggctctct            |
| <i>Fdps</i>          | mouse   | tcgggtgaaagcactgtatg     | gcactgctctatgagactcttg          |
| <i>Fdft1</i>         | mouse   | cccatagttggtgaagacatagag | cttctgttggtcttccagataa          |
| <i>Lss</i>           | mouse   | ggaaggactcaacaccctattc   | cagtaactcatgggcagatagac         |
| <i>Cyp51</i>         | mouse   | aggatctgcctcccttaact     | ggcctcagtcttagtgtttctt          |
| <i>Hsd17b7</i>       | mouse   | tcaaccagaagggtctgtattc   | gtaggagcaacgtccagataaa          |
| <i>Dhcr24</i>        | mouse   | gagtcacgtcccacaagtatg    | ggcatagaacaggctgagttt           |
| <i>Srebf2</i>        | mouse   | tggatgacgcaaaggtaa       | caggaaggtagggacacataag          |
| <i>Hmgcr</i>         | mouse   | ctcatgaacgtggtgtgtctat   | gctcccatcaccaaggaataa           |
| <i>Gapdh</i>         | rat     | tccagtatgactctaccacg     | cacgacatactcagcaccag            |
| <i>Mbp</i>           | rat     | ttgactccatcgggcgcttcttta | ttcatcttgggtcctctgcgactt        |
| <i>Cnp</i>           | rat     | ctactttggcaagagacctcc    | agagatggacagtttgaaggc           |
| <i>Plp1</i>          | rat     | tctttggcgactacaagaccacca | caaacaatgacacaccgctccaa         |
| <i>Mag</i>           | rat     | acagegtcctggacatcatcaaca | atgcagctgacctctacttccgtt        |
| <i>Id2</i>           | rat     | atggaaatcctgcagcacgctc   | acgtttggttctgtccaggctct         |
| <i>Tcf712</i>        | rat     | atggttagtaccacagcaagg    | gggaggggaacctagacataga          |
| <i>Kaiso</i>         | rat     | ctgctgaactcctgaaatgaa    | ctgagaagagctgatggaagtaag        |
| <i>Hes5</i>          | rat     | accageccaactccaaac       | agtaaccctcgctgtagtc             |
| <i>Myrf</i>          | rat     | actgccaacaacatgcggaagaag | tgggttagaggcccgaacaatgat        |
| <i>Id4</i>           | rat     | actgtgcctgcagtgcgatatgaa | tgc agg atc tcc act ttg ctg act |
| <i>Sp5</i>           | rat     | ttcgtgtgcaactggctctt     | aggtgatcgttcgcgatgaa            |
| <i>Wnt10a</i>        | rat     | actccgacctgggtctacttt    | gacctgtgctgctcttattg            |
| <i>Wnt4</i>          | rat     | gaagaggaaacgtgcgagaa     | tggatttggcactcctcaatg           |
| <i>Wnt11</i>         | rat     | aacaggatcccaagccaataa    | catggcacttacacttctgttcc         |
| <i>Dhcr24</i>        | rat     | cgtggaagggtgtgtatt       | gaagaaccacggctttagtaa           |
| <i>Lss</i>           | rat     | acactgggctggtgattatg     | ccgtaccatttctctctgtatc          |

|                |     |                         |                         |
|----------------|-----|-------------------------|-------------------------|
| <i>Cyp51</i>   | rat | aggatctgcctcccttaact    | ggcctcagtcttagtgtttctt  |
| <i>Hsd17b7</i> | rat | ctctcaaccctctgaccaaatac | gtgtcttcatctacgtccatctt |
| <i>Axin2</i>   | rat | caacgacagcggattatcca    | ctctctctggagctgtttcttac |
| <i>Hes1</i>    | rat | agaaaaattcctcgtccccg    | tttcattattcttgccccggc   |

### Primer sequences for ChIP-qPCR

| Rat gene       | Forward                 | Reverse                 |
|----------------|-------------------------|-------------------------|
| <i>Ctnnb1</i>  | cagacagcaagctgaagaga    | ggcttctaaatcccagacaa    |
| <i>Ccnd1</i>   | ctggaggctgcaggacttt     | ttctctgcccggctttgat     |
| <i>Wnt11</i>   | ctgacgtgggcggatcaaa     | atctccggagctctctctct    |
| <i>Wnt10a</i>  | gtagcagctgactccacttag   | gggcttgtaagatgcacaattag |
| <i>Lef1</i>    | gactggctgggatccatattc   | ctgcggctttcatcctttct    |
| <i>Axin2</i>   | gaggtctccgcaaggagtg     | ggcctgccaaacttcaaagc    |
| <i>Sp5</i>     | gagccgctattctttgatgattg | agaatttgataagggctttgctg |
| <i>Control</i> | ttacaggcacataggaggtaaa  | gaatgcatacaccaccacaag   |
| <i>Myrf</i>    | gctccagtgtctgtgctatg    | cccagcatcctgttccattta   |
| <i>Fdps</i>    | caagatgtttgcggcttacac   | aggctgggagctgtagtatt    |
| <i>Fdft1</i>   | gattggaggctggaagaa      | tggctctacacctacacctc    |
| <i>Lss</i>     | gccaatcagagcatcacca     | taggccagcctccaaa        |
| <i>Cyp51</i>   | attcttgagccctcacttctc   | cgctccagctaggtact       |
| <i>Hsd17b7</i> | ggagtctttgtctgagtgagg   | agccacctttgacttggatt    |
| <i>Dhcr24</i>  | tctagtctgggctactccattt  | atgaagaatgtgtgaggagtt   |
| <i>Srebf2</i>  | ctggaactgatccaacggaaa   | ctcagatttgcatagcgagact  |

### Primer sequences for promoter cloning

| Rat gene                | Forward               | Reverse               |
|-------------------------|-----------------------|-----------------------|
| <i>Cyp51</i> promoter   | cgctgaatagctgcagaggc  | tcctgtcacctgctccatcg  |
| <i>Hsd17b7</i> promoter | tgtcaccgagcaccagtgag  | tacagcagcctgataggcac  |
| <i>Lss</i> promoter     | agcgagaggaagcagccttc  | caaccctggaggttcccat   |
| <i>Dhcr24</i> promoter  | ctaaccaagataatataatc  | aggaagaggcacacaaaaca  |
| <i>Hmgcs1</i> promoter  | gctgctctggaactagaaag  | aaaccgctccctgagcctat  |
| <i>Hmgcr</i> promoter   | agcgcgagaccgctgcc     | gcaccgagagtggaag      |
| <i>Fdft1</i> promoter   | tgagagaccgaacaagctc   | gggattgcaggtgtgagctt  |
| <i>Fdps</i> promoter    | ccgtaactccgacacgactg  | ccttgcgcttctaggcaag   |
| <i>Srebf2</i> promoter  | gtctcggatgggacaagtgtg | ttctcatccatcggccagttc |

### Primer sequences for generating *Tcf7l2*ΔHMG via mutagenesis

cctgcgccgagaatctggt  
gggaagaagaagaagagaaaaagacaagcag
